# Supplementary material for: Brief communication: Uncertainties in Southern Ocean sea surface conditions and their impact on Antarctic climate over 1958–1978
Source: Copernicus journal article supplement (doi:10.5194/egusphere-2025-5634), 2025-12-09
Supplement: Supplementary file 1 [file egusphere-2025-5634-supplement.pdf]

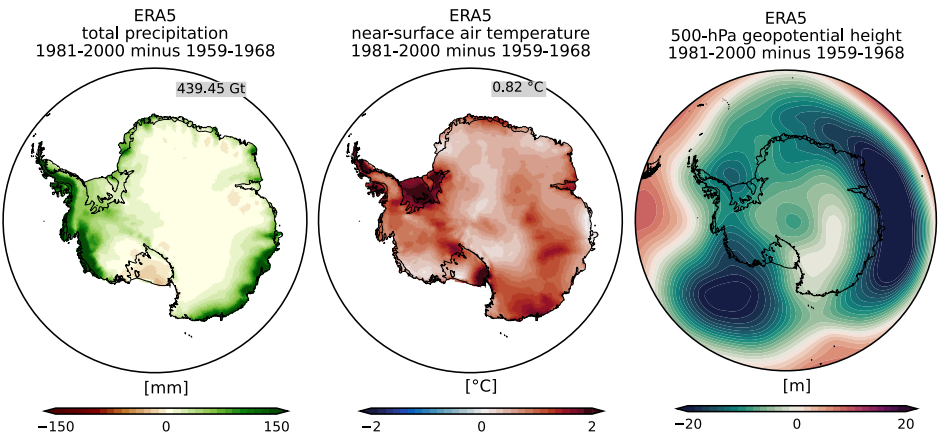

**Figure S1.** Total precipitation (left), near-surface air temperature (center) and 500-hPa geopotential heights (right) changes between 1981–2000 and 1959–1968 in ERA5. For total precipitation and near-surface air temperature, the corresponding continental mean change is also indicated.
